# Supplementary material for: The Genetic Epidemiology of Treated Major Depression in Sweden
Source: Atypon-hosted journal article supplement (doi:10.1176/appi.ajp.2018.17111251), 2018-07-19

**TABLE S1. Definitions of Our Putative Indices of Familial Risk Assessed in Probands With Major Depression**

- 
1. Age at first registration: was centered at the mean value (age 29) and inverted so that lower ages represent positive values.
  2. Number of episodes: a new episode was defined as a major depression (MD) registration that was preceded by at least a 3-month period without any registration for MD. The variable was included as a categorical variable in the models (1, 2, 3-4 and 5 or more episodes), using 1 episode as reference.
  3. History of anxiety disorder (AD): AD was identified in the Hospital Discharge, Outpatient (Specialist) Care and Primary Care Registries by the following ICD codes: ICD-9: 300.0, 300.2; ICD-10: F40, F41. The AD diagnose could be registered at any time.
  4. History of Antidepressants (AnD): AnD was based on Anatomical Therapeutic Chemical (ATC) codes N06A in the Prescribed Drug Register (containing all prescriptions in Sweden picked up by patients from 2005 to 2014).
  5. Psychiatric registration (PR): PR was categorized into three groups based on where the MD diagnose was registered; (1) psychiatric clinic from the Hospital Discharge register; (2) psychiatric clinic from the Outpatient (Specialist) Care register; (3) other type of registration. In the models, we used other type of registration as the reference group.
  6. History of electroconvulsive therapy (ECT): ECT was identified in the Hospital Discharge, Outpatient (Specialist) Care and by the following codes (procedure codes): DA006, DA024, and DA025. The ECT could be registered at any time.
  7. Sick-leave registration (SL): SL is categorized into a binary variable based on whether or not the proband has received any income compensation for illness during the same year as the MD registration.
  8. Early retirement registration (ER): ER is categorized into a binary variable based on whether or not the proband has received any early retirement within four years of the MD registration. Early Retirement Pension was paid to people aged 16- 64 and granted when their working capability was deemed to be permanently reduced by at least one quarter due to medical reasons.
-

**TABLE S2. Hazard Ratios (and % MD in Relative) Based on Deciles of the Sum of the Standardized (Mean 0 and std 1) Variable**

| Z-Score | MZ-Twins          |      | Full Siblings     |      | Half Siblings     |      | Cousins           |      | P- value for interaction term between genetic resemblance and Z-score group |
|---------|-------------------|------|-------------------|------|-------------------|------|-------------------|------|-----------------------------------------------------------------------------|
|         |                   | % MD |                   | % MD |                   | % MD |                   | % MD |                                                                             |
| 1       | Ref               | 23.5 | Ref               | 16.9 | Ref               | 19.6 | Ref               | 15.0 |                                                                             |
| 2       | 1.28 (1.14; 1.43) | 24.4 | 1.10 (1.05; 1.15) | 18.5 | 1.01 (0.99; 1.04) | 19.3 | 0.98 (0.95; 1.00) | 14.6 | 0.0016                                                                      |
| 3       | 1.36 (1.21; 1.52) | 32.1 | 1.13 (1.08; 1.18) | 18.4 | 1.03 (1.00; 1.05) | 20.2 | 0.98 (0.95; 1.01) | 14.7 | 0.0009                                                                      |
| 4       | 1.51 (1.34; 1.69) | 22.6 | 1.19 (1.13; 1.24) | 19.2 | 1.05 (1.03; 1.08) | 21.1 | 0.99 (0.97; 1.02) | 14.8 | 0.0013                                                                      |
| 5       | 1.50 (1.34; 1.68) | 29.7 | 1.18 (1.12; 1.23) | 19.0 | 1.04 (1.02; 1.07) | 20.8 | 0.98 (0.96; 1.01) | 14.6 | 0.0001                                                                      |
| 6       | 1.87 (1.67; 2.09) | 35.7 | 1.28 (1.22; 1.34) | 20.0 | 1.06 (1.03; 1.09) | 21.6 | 0.96 (0.94; 0.99) | 14.4 | <0.0001                                                                     |
| 7       | 1.96 (1.75; 2.19) | 42.9 | 1.32 (1.26; 1.38) | 20.8 | 1.08 (1.06; 1.11) | 20.2 | 0.98 (0.96; 1.01) | 14.7 | <0.0001                                                                     |
| 8       | 2.29 (2.05; 2.57) | 46.2 | 1.39 (1.33; 1.48) | 21.5 | 1.09 (1.06; 1.11) | 20.5 | 0.96 (0.93; 0.99) | 14.3 | <0.0001                                                                     |
| 9       | 2.57 (2.30; 2.87) | 50.8 | 1.48 (1.41; 1.54) | 22.4 | 1.12 (1.09; 1.15) | 21.2 | 0.97 (0.95; 1.00) | 14.4 | <0.0001                                                                     |
| 10      | 2.82 (2.52; 3.15) | 53.0 | 1.53 (1.47; 1.60) | 22.8 | 1.13 (1.10; 1.16) | 21.9 | 0.97 (0.94; 1.00) | 14.4 | <0.0001                                                                     |

**TABLE S3. Tetrachoric Correlations for Major Depression in Maternal and Paternal Half-Siblings Reared Apart**

| Sex           | N Pairs | % MD        | Correlation   |
|---------------|---------|-------------|---------------|
| All           |         |             |               |
| Male-Male     | 26,596  | 9.6%        | 0.083 (0.018) |
| Female-Female | 23,811  | 17.1%       | 0.145 (0.014) |
| Male-Female   | 49,634  | 9.6%/16.8%  | 0.126 (0.011) |
| Maternal      |         |             |               |
| Male-Male     | 3,877   | 10.5%       | 0.079 (0.044) |
| Female-Female | 2,967   | 18.4%       | 0.138 (0.038) |
| Male-Female   | 6,698   | 10.1%/17.7% | 0.152 (0.029) |
| Paternal      |         |             |               |
| Male-Male     | 22,719  | 9.4%        | 0.083 (0.019) |
| Female-Female | 20,844  | 16.9%       | 0.146 (0.015) |
| Male-Female   | 42,936  | 9.5%/16.7%  | 0.122 (0.012) |

**TABLE S4. Different Definitions of Reared-Together and Reared-Apart Half-Siblings and Their Impact on Estimates of Genetic, Shared Environmental, and Individual-Specific Environmental Effects for Major Depression**

| Half-Sibs Reared Together and Apart $\leq$ | $\geq 90\%/\leq 10\%$ | $\geq 80\%/\leq 20\%$ | $\geq 70\%/\leq 30\%$ |
|--------------------------------------------|-----------------------|-----------------------|-----------------------|
| r                                          | 0.87 (0.84; 0.87)     | 0.89 (0.87; 0.91)     | 0.86 (0.86; 0.87)     |
| a <sup>2</sup> m                           | 0.40 (0.39; 0.40)     | 0.36 (0.31; 0.38)     | 0.38 (0.37; 0.38)     |
| c <sup>2</sup> m                           | 0.03 (0.03; 0.03)     | 0.05 (0.05; 0.05)     | 0.04 (0.03; 0.04)     |
| e <sup>2</sup> m                           | 0.58 (0.56; 0.58)     | 0.59 (0.58; 0.61)     | 0.58 (0.56; 0.59)     |
| a <sup>2</sup> f                           | 0.49 (0.48; 0.51)     | 0.51 (0.51; 0.53)     | 0.47 (0.47; 0.48)     |
| c <sup>2</sup> f                           | 0.03 (0.03; 0.03)     | 0.02 (0.02; 0.02)     | 0.04 (0.03; 0.04)     |
| e <sup>2</sup> f                           | 0.49 (0.47; 0.49)     | 0.47 (0.46; 0.49)     | 0.49 (0.48; 0.49)     |

**TABLE S5. Sample Size, Lifetime Prevalence and Tetrachoric Correlations for Treated Major Depression in Swedish Twin, Full Sibling, and Half-Sibling Pairs, With Exclusion Criteria (for cases of BPI and SZ) Eliminated**

|                               | Sex           | N Pairs | Lifetime Prevalence of MD (%) | Tetrachoric Correlation (SE) |
|-------------------------------|---------------|---------|-------------------------------|------------------------------|
| Monozygotic Twins             | Male-Male     | 3,660   | 7.6                           | 0.436 (0.042)                |
|                               | Female-Female | 4,338   | 13.1                          | 0.508 (0.028)                |
| Dizygotic Twins               | Male-Male     | 3,938   | 7.1                           | 0.198 (0.051)                |
|                               | Female-Female | 4,030   | 12.9                          | 0.266 (0.036)                |
|                               | Male-Female   | 11,004  | 7.2/12.9                      | 0.229 (0.026)                |
| Full-Siblings Reared Together | Male-Male     | 418,200 | 7.2                           | 0.227 (0.005)                |
|                               | Female-Female | 371,352 | 13.4                          | 0.275 (0.004)                |
|                               | Male-Female   | 781,793 | 7.4/13.3                      | 0.218 (0.003)                |
| Full-Siblings Reared Apart    | Male-Male     | 3,730   | 11.1                          | 0.136 (0.043)                |
|                               | Female-Female | 2,891   | 19.0                          | 0.214 (0.037)                |
|                               | Male-Female   | 6,891   | 11.7/18.2                     | 0.127 (0.028)                |
| Half-Siblings Reared Together | Male-Male     | 13,618  | 10.4                          | 0.159 (0.023)                |
|                               | Female-Female | 13,040  | 18.9                          | 0.171 (0.018)                |
|                               | Male-Female   | 26,026  | 10.8/18.5                     | 0.142 (0.014)                |
| Half-Siblings Reared Apart    | Male-Male     | 27,558  | 10.2                          | 0.088 (0.017)                |
|                               | Female-Female | 24,890  | 18.1                          | 0.142 (0.013)                |
|                               | Male-Female   | 51,774  | 10.3/17.9                     | 0.126 (0.011)                |

**TABLE S6. Parameter Estimates (and 95% Confidence Intervals) From the Full Models Applied to the Twins and Reared-Together and Reared-Apart Full and Half-Siblings With Exclusion Criteria (for cases of BPI and SZ) Eliminated**

|                        | $a^2_m$             | $c^2_m$             | $e^2_m$             | $a^2_f$             | $c^2_f$             | $e^2_f$             | r                   |
|------------------------|---------------------|---------------------|---------------------|---------------------|---------------------|---------------------|---------------------|
| Twins                  | 0.43<br>(0.20-0.50) | 0.00<br>(0.00-0.18) | 0.57<br>(0.50-0.64) | 0.48<br>(0.31-0.56) | 0.02<br>(0.00-0.17) | 0.49<br>(0.44-0.55) | 1.00<br>(0.80-1.00) |
| Full and Half-Siblings | 0.36<br>(0.34-0.37) | 0.05<br>(0.05-0.06) | 0.59<br>(0.57-0.60) | 0.51<br>(0.51-0.52) | 0.02<br>(0.02-0.02) | 0.47<br>(0.46-0.48) | 0.87<br>(0.86-0.89) |

**TABLE S7. Sample Size, Sex Composition, and Clinical Features in Affected Probands in Pairs of Relatives Used in the Analyses to Examine the Clinical Features of Major Depression Which Predict Risk of Illness in Relatives With Exclusion Criteria (for cases of BPI and SZ) Eliminated**

|                                                | MZ-Twins   | Full Siblings | Half Siblings | Cousins       |
|------------------------------------------------|------------|---------------|---------------|---------------|
| N Pairs                                        | 759        | 191,982       | 73,011        | 686,138       |
| % MD in Relative                               | 36.9%      | 21.1%         | 21.8%         | 15.2%         |
| Mean age at Reg                                | 29.4 (5.7) | 28.0 (5.8)    | 28.2 (6.1)    | 28.3 (6.0)    |
| Mean # episodes                                | 2.40 (2.0) | 2.33 (2.0)    | 2.34 (1.9)    | 2.32 (2.0)    |
| Mean YoB                                       | 1979       | 1980          | 1980          | 1980          |
| AD Registration                                | 388 (41%)  | 100,114 (52%) | 40,810 (56%)  | 357,558 (52%) |
| Antidepressants                                | 599 (79%)  | 150,686 (78%) | 58,359 (80%)  | 543,265 (79%) |
| ECT                                            | 10 (1.3%)  | 1,628 (0.9%)  | 567 (0.8%)    | 5,581 (0.8%)  |
| Sick leave                                     | 260 (34%)  | 66,976 (35%)  | 27,671 (38%)  | 250,300 (36%) |
| Early Retirement                               | 82 (11%)   | 18,301 (10%)  | 8,961 (11%)   | 70,874 (10%)  |
| No Psychiatric<br>Registration                 | 464 (61%)  | 112,590 (59%) | 39,283 (54%)  | 389,428 (57%) |
| Psychiatric Registration<br>in Specialist Care | 193 (25%)  | 56,945 (30%)  | 23,442 (32%)  | 212,397 (31%) |
| Psychiatric Registration<br>in patient Care    | 102 (13%)  | 22,447 (12%)  | 10,286 (14%)  | 84,313 (12%)  |

**TABLE S8. Analyses of Individual Clinical Features of Major Depression and Their Association with Risk for Major Depression in Monozygotic Co-twins, full siblings, half-siblings and cousins. With Exclusion Criteria (for cases of BPI and SZ) Eliminated**

|                                                                                                                                                             | MZ-Twins          | Full Siblings     | Half Siblings     | Cousins           | P value, interaction between genetic resemblance and predictor |
|-------------------------------------------------------------------------------------------------------------------------------------------------------------|-------------------|-------------------|-------------------|-------------------|----------------------------------------------------------------|
| <b>Number of Episodes</b>                                                                                                                                   |                   |                   |                   |                   |                                                                |
| 1                                                                                                                                                           | Reference         | Reference         | Reference         | Reference         |                                                                |
| 2                                                                                                                                                           | 1.23 (1.16; 1.31) | 1.12 (1.10; 1.15) | 1.07 (1.06; 1.09) | 1.05 (1.03; 1.07) | <0.0001                                                        |
| 3-4                                                                                                                                                         | 1.44 (1.36; 1.53) | 1.22 (1.19; 1.25) | 1.12 (1.10; 1.13) | 1.07 (1.05; 1.09) | <0.0001                                                        |
| 5+                                                                                                                                                          | 1.88 (1.75; 2.02) | 1.38 (1.34; 1.41) | 1.18 (1.16; 1.19) | 1.09 (1.07; 1.11) | <0.0001                                                        |
| <b>Age At Diagnosis</b>                                                                                                                                     |                   |                   |                   |                   |                                                                |
| 1 Year decrease                                                                                                                                             | 1.05 (1.04; 1.05) | 1.02 (1.02; 1.02) | 1.01 (1.00; 1.01) | 1.00 (1.00; 1.00) | <0.0001                                                        |
| <b>Antidepressants</b>                                                                                                                                      |                   |                   |                   |                   |                                                                |
| Yes                                                                                                                                                         | 1.52 (1.43; 1.61) | 1.19 (1.17; 1.22) | 1.06 (1.04; 1.07) | 1.00 (0.98; 1.01) | <0.0001                                                        |
| <b>ECT</b>                                                                                                                                                  |                   |                   |                   |                   |                                                                |
| Yes                                                                                                                                                         | 1.22 (0.95; 1.57) | 1.03 (0.93; 1.14) | 0.95 (0.90; 1.01) | 0.91 (0.85; 0.97) | 0.09                                                           |
| <b>Specialist or In-Patient Care</b>                                                                                                                        |                   |                   |                   |                   |                                                                |
| None                                                                                                                                                        | Reference         | Reference         | Reference         | Reference         |                                                                |
| Specialist Care                                                                                                                                             | 1.23 (1.17; 1.30) | 1.01 (0.97; 1.04) | 0.91 (0.90; 0.93) | 0.87 (0.86; 0.88) | <0.0001                                                        |
| In-patient Care                                                                                                                                             | 1.28 (1.19; 1.37) | 1.03 (1.00; 1.06) | 0.93 (0.91; 0.94) | 0.88 (0.86; 0.90) | <0.0001                                                        |
| <b>Anxiety Disorder</b>                                                                                                                                     |                   |                   |                   |                   |                                                                |
| AD                                                                                                                                                          | 1.49 (1.42; 1.56) | 1.23 (1.20; 1.25) | 1.11 (1.10; 1.13) | 1.06 (1.05; 1.07) | <0.0001                                                        |
| <b>Sick leave</b>                                                                                                                                           |                   |                   |                   |                   |                                                                |
| Yes                                                                                                                                                         | 0.91 (0.87; 0.96) | 0.98 (0.96; 1.00) | 1.01 (1.00; 1.02) | 1.03 (1.02; 1.04) | <0.0001                                                        |
| <b>Early Retirement</b>                                                                                                                                     |                   |                   |                   |                   |                                                                |
| Yes                                                                                                                                                         | 1.39 (1.29; 1.50) | 1.16 (1.12; 1.19) | 1.06 (1.04; 1.07) | 1.01 (0.99; 1.03) | <0.0001                                                        |
| Analyses control for Year of Birth, Gender and Age Difference in relative pairs. Results presented are from a model applied to all four groups of relatives |                   |                   |                   |                   |                                                                |

FIGURE S1. With Exclusion Criteria (for cases of BPI and SZ) Eliminated

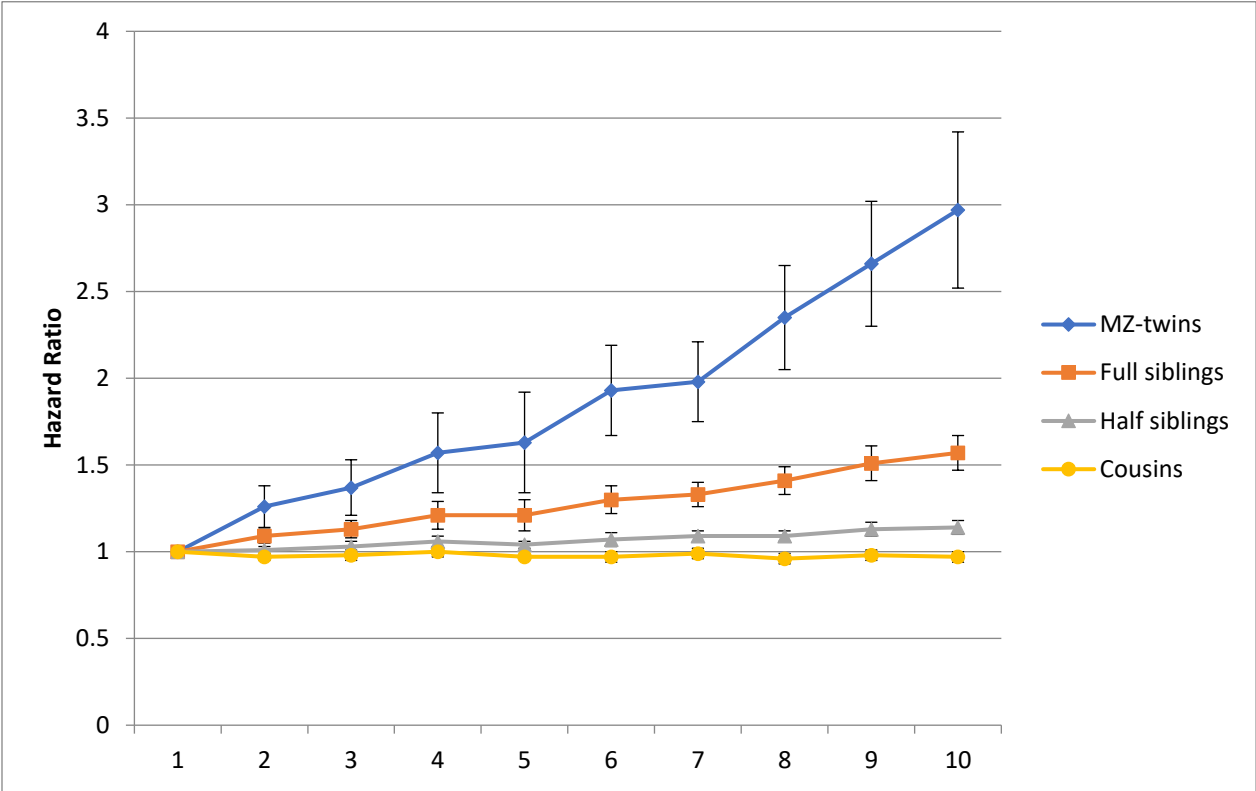

Supplement: appi.ajp.2018.17111251.ds001.pdf [file appi.ajp.2018.17111251.ds001.pdf]
